# Supplementary material
Source: PubMed Central journal article supplement (PMC3078472)

**Supplemental Figure 1. Validation anti-LCE2 antibody on bacterial lysates expressing recombinant human flag-LCE2A**

The anti-LCE2 antibody was raised in a rabbit against a synthetic peptide. This peptide perfectly matches LCE2B, C and D and differs one amino acid from LCE2A. Validation of 2 different bleeds (#73 and #74) on bacterial lysates expressing human flag-LCE2A showed a band at about 20-25 kDa which was specific. This band was detected by both anti-Flag and anti-LCE2A antibodies. Antibodies 74 give higher specific signal than antibodies 73 but also higher background. Both bleeds were used in immunohistochemistry and showed similar results.

**Detection of His6-Flag-LCE2A in BL21(pLysS) E.coli ( pRSETa empty vs pRSETa-LCE2A, +/- induction w/IPTG 1mM)**

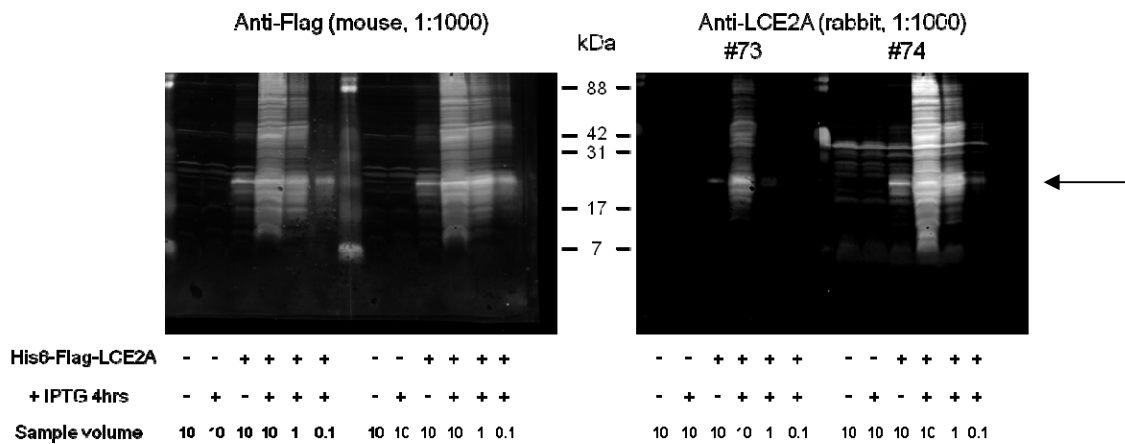

Supplement: mmc1.pdf [file mmc1.pdf]
