# Supplementary material
Source: PubMed Central journal article supplement (PMC3078472)

### Supplemental Figure 3. LCE expression in stratifying epidermis in reconstructed skin

(A) Relative mRNA expression levels of *LCE* genes in epidermal sheets from skin constructs. Adult human keratinocytes were seeded on a de-epidermized dermis, and cultured for three days submerged, followed by 0, 3, 6, 9, 12 or 15 days culturing at the air-liquid interphase. All values were expressed relative to *LCE1A* at day 0, which was set at unity, to allow comparison of the expression levels between genes. Mean and SD. (B) Immunohistochemical staining with an anti-LCE2 antibody on sections of reconstructed skin at different time points during the process of epidermal stratification. Bar = 50  $\mu$ m.

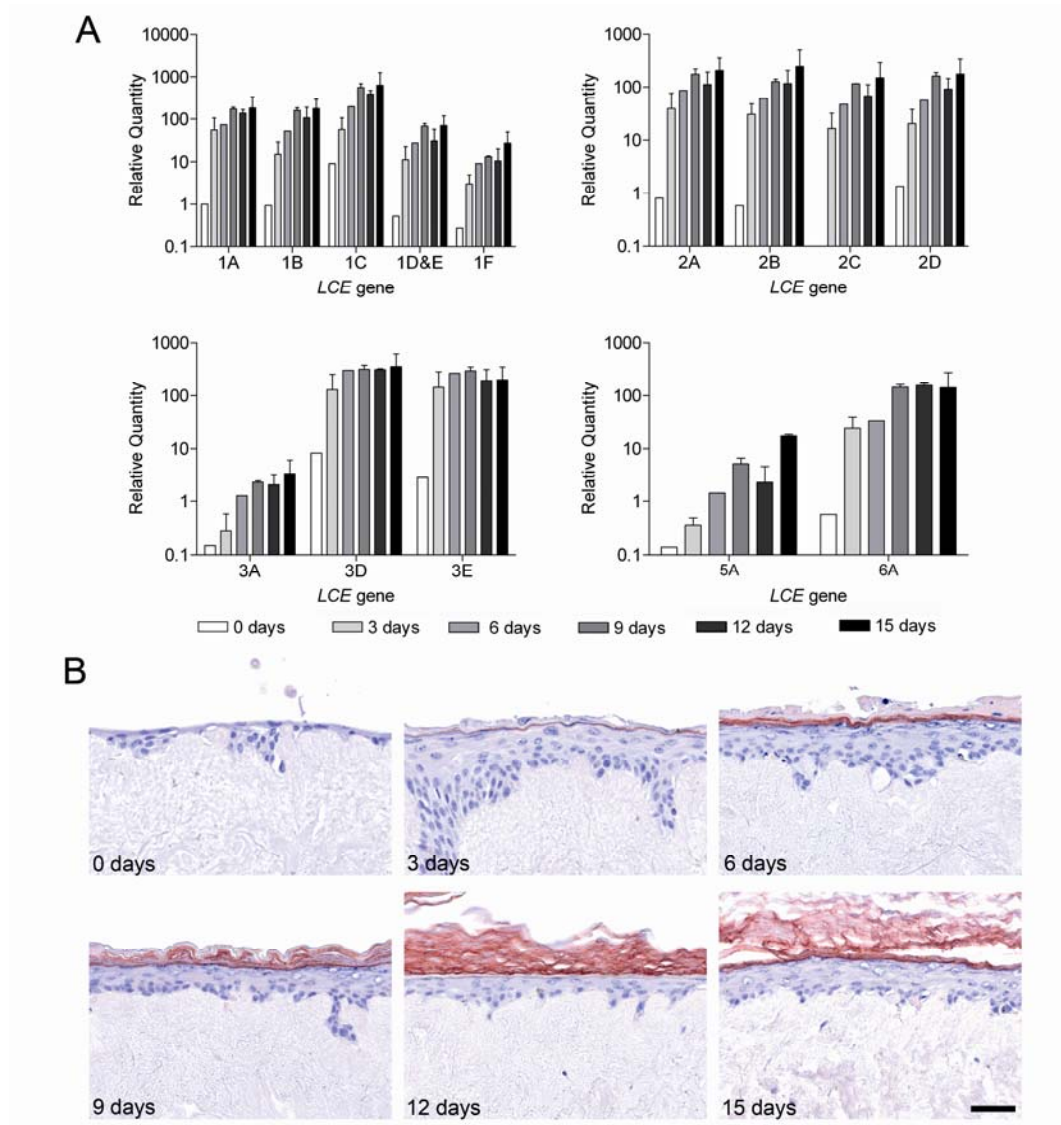

Supplement: mmc3.pdf [file mmc3.pdf]
