# Supplementary material
Source: PubMed Central journal article supplement (PMC3078472)
Supplement: mmc4.pdf [file mmc4.pdf]

**Supplemental Table 1. qPCR data on *LCE* gene expression in epidermis of normal and psoriatic skin**

| HUGO symbol              | mRNA <i>in vivo</i>              |                     | Ratio Relative Q PV/NS | P value <sup>4</sup> |
|--------------------------|----------------------------------|---------------------|------------------------|----------------------|
|                          | dCt <sup>1</sup> NS <sup>2</sup> | dCt PS <sup>3</sup> |                        |                      |
| <b><i>LCE1 group</i></b> |                                  |                     |                        |                      |
| LCE1A                    | 4.1                              | 6.8                 | 0.30                   | <b>0.020</b>         |
| LCE1B                    | 5.5                              | 8.7                 | 0.18                   | <b>0.007</b>         |
| LCE1C                    | 3.9                              | 6.9                 | 0.21                   | <b>0.008</b>         |
| LCE1D&E                  | 5.0                              | 7.6                 | 0.18                   | <b>0.012</b>         |
| LCE1F                    | 7.7                              | 10.7                | 0.23                   | <b>0.006</b>         |
| <b><i>LCE2 group</i></b> |                                  |                     |                        |                      |
| LCE2A                    | 4.8                              | 6.4                 | 0.58                   | 0.110                |
| LCE2B                    | 4.3                              | 7.9                 | 0.13                   | <b>0.005</b>         |
| LCE2C                    | 5.3                              | 7.4                 | 0.45                   | 0.074                |
| LCE2D                    | 5.2                              | 7.9                 | 0.29                   | <b>0.050</b>         |
| <b><i>LCE3 group</i></b> |                                  |                     |                        |                      |
| LCE3A                    | 14                               | 6.3                 | 185                    | <b>0.000</b>         |
| LCE3C                    | 14                               | 9.4                 | 51                     | <b>0.024</b>         |
| LCE3D                    | 6.5                              | 3.6                 | 8.6                    | <b>0.001</b>         |
| LCE3E                    | 8.1                              | 5.2                 | 7.9                    | <b>0.009</b>         |
| <b><i>LCE5 group</i></b> |                                  |                     |                        |                      |
| LCE5A                    | 6.1                              | 10                  | 0.13                   | <b>0.003</b>         |
| <b><i>LCE6 group</i></b> |                                  |                     |                        |                      |
| LCE6A                    | 6.8                              | 9.6                 | 0.25                   | <b>0.028</b>         |

<sup>1</sup>dCt: Delta PCR cycle time. <sup>2</sup>mRNA expression data from epidermal cells of normal skin (NS) (N=6), <sup>3</sup>psoriatic plaques (PS) (N=6), <sup>4</sup>P-values of t-test. Bold: p-value < 0.05.
