# Supplementary material
Source: PubMed Central journal article supplement (PMC3078472)
Supplement: mmc5.pdf [file mmc5.pdf]

**Supplemental Table 2. qPCR data on *LCE* gene expression in epidermis of uninvolved and involved psoriatic skin**

| HUGO symbol              | mRNA <i>in vivo</i>                      |                           | Ratio Relative Q    | P value <sup>4</sup> |
|--------------------------|------------------------------------------|---------------------------|---------------------|----------------------|
|                          | dCt <sup>1</sup> uninvolved <sup>2</sup> | dCt involved <sup>3</sup> | involved/uninvolved |                      |
| <b><i>LCE1 group</i></b> |                                          |                           |                     |                      |
| LCE1A                    | 5.0                                      | 6.4                       | 0.46                | 0.171                |
| LCE1B                    | 4.6                                      | 8.6                       | 0.08                | <b>0.016</b>         |
| LCE1C                    | 4.1                                      | 6.6                       | 0.19                | <b>0.021</b>         |
| LCE1D&E                  | 6.5                                      | 7.8                       | 0.58                | 0.307                |
| LCE1F                    | 7.0                                      | 10.8                      | 0.11                | <b>0.042</b>         |
| <b><i>LCE2 group</i></b> |                                          |                           |                     |                      |
| LCE2A                    | 5.0                                      | 6.2                       | 0.68                | 0.345                |
| LCE2B                    | 3.8                                      | 7.8                       | 0.05                | <b>0.033</b>         |
| LCE2C                    | 5.2                                      | 7.3                       | 0.29                | 0.076                |
| LCE2D                    | 4.6                                      | 7.9                       | 0.19                | 0.066                |
| <b><i>LCE3 group</i></b> |                                          |                           |                     |                      |
| LCE3A                    | 9.5                                      | 6.0                       | 6.2                 | 0.053                |
| LCE3C                    | 13.9                                     | 9.7                       | 57                  | 0.114                |
| LCE3D                    | 4.3                                      | 3.4                       | 2.3                 | 0.158                |
| LCE3E                    | 6.1                                      | 5.0                       | 3.5                 | 0.295                |
| <b><i>LCE5 group</i></b> |                                          |                           |                     |                      |
| LCE5A                    | 6.4                                      | 10.3                      | 0.10                | <b>0.018</b>         |
| <b><i>LCE6 group</i></b> |                                          |                           |                     |                      |
| LCE6A                    | 6.4                                      | 9.6                       | 0.17                | 0.053                |

<sup>1</sup>dCt: Delta PCR cycle time. <sup>2</sup>mRNA expression data from epidermal cells of uninvolved psoriatic skin (N=4), <sup>3</sup>involved psoriatic skin (N=4), <sup>4</sup>P-values of paired t-test. Bold: p-value < 0.05.
