# Supplementary material
Source: PubMed Central journal article supplement (PMC3078472)
Supplement: mmc6.pdf [file mmc6.pdf]

**Supplemental Table 3. qPCR data on *LCE* gene expression in epidermis of normal skin before and after tape-stripping**

| HUGO symbol              | mRNA <i>in vivo</i>                     |                           | Ratio Relative Q   | P value <sup>4</sup> |
|--------------------------|-----------------------------------------|---------------------------|--------------------|----------------------|
|                          | dCt <sup>1</sup> before TS <sup>2</sup> | dCt after TS <sup>3</sup> | after TS/before TS |                      |
| <b><i>LCE1 group</i></b> |                                         |                           |                    |                      |
| LCE1A                    | 4.7                                     | 8.1                       | 0.14               | <b>0.002</b>         |
| LCE1B                    | 4.8                                     | 8.5                       | 0.11               | <b>0.002</b>         |
| LCE1C                    | 4.4                                     | 7.3                       | 0.17               | <b>0.002</b>         |
| LCE1D&E                  | 6.8                                     | 9.7                       | 0.06               | <i>0.093</i>         |
| LCE1F                    | 8.2                                     | 11.4                      | 0.12               | <b>0.001</b>         |
| <b><i>LCE2 group</i></b> |                                         |                           |                    |                      |
| LCE2A                    | 4.7                                     | 7.4                       | 0.19               | <b>0.006</b>         |
| LCE2B                    | 5.0                                     | 8.6                       | 0.09               | <b>0.000</b>         |
| LCE2C                    | 5.0                                     | 7.8                       | 0.18               | <b>0.002</b>         |
| LCE2D                    | 5.2                                     | 8.4                       | 0.14               | <b>0.006</b>         |
| <b><i>LCE3 group</i></b> |                                         |                           |                    |                      |
| LCE3A                    | 11.5                                    | 6.5                       | 12                 | <b>0.015</b>         |
| LCE3C                    | 12.4                                    | 8.2                       | 20                 | <i>0.078</i>         |
| LCE3D                    | 5.5                                     | 2.5                       | 5.8                | <b>0.044</b>         |
| LCE3E                    | 7.2                                     | 4.6                       | 5.3                | <b>0.046</b>         |
| <b><i>LCE5 group</i></b> |                                         |                           |                    |                      |
| LCE5A                    | 5.4                                     | 11.3                      | 0.03               | <b>0.001</b>         |
| <b><i>LCE6 group</i></b> |                                         |                           |                    |                      |
| LCE6A                    | 7.6                                     | 10.9                      | 0.13               | <b>0.001</b>         |

<sup>1</sup>dCt: Delta PCR cycle time. <sup>2</sup>mRNA expression data from epidermal cells of normal skin before tape-stripping (TS) (N=5), <sup>3</sup> after tape-stripping (N=5), <sup>4</sup>P-values of paired t-test. Bold: p-value < 0.05.
